# Supplementary material
Source: Research Square preprint supplement (doi:10.21203/rs.3.rs-9192889/v1)
Supplement: Supplementary file 1 [file 1593295372a8c3379d2517df.docx]

**Supplementary material Table 1-STROBE checklist**

STROBE Statement—checklist of items that should be included in reports of observational studies

|  | **Item No.** | **Recommendation** | **Page  No.** | **Relevant text from manuscript** |
| --- | --- | --- | --- | --- |
| **Title and abstract** | 1 | (*a*) Indicate the study’s design with a commonly used term in the title or the abstract |  | Retrospective disproportionality analysis |
| (*b*) Provide in the abstract an informative and balanced summary of what was done and what was found |  | Include abstract |
| **Introduction** | | | |  |
| Background/rationale | 2 | Explain the scientific background and rationale for the investigation being reported |  | Glucagon-like peptide-1 receptor agonists (GLP-1RAs) are a cornerstone in the management of type 2 diabetes mellitus and obesity due to their demonstrated efficacy in glycemic control, weight reduction and lowering risk of cardiovascular diseases. Concurrent to the increase in the prescription and use of these agents, attention has shifted to evaluate safety concerns, including gallbladder-related adverse events. Biliary complications such as cholelithiasis, cholecystitis, biliary colic and biliary cancer have been reported in GLP-1RA users. |
| Objectives | 3 | State specific objectives, including any prespecified hypotheses |  | To evaluate and compare biliary adverse events across individual GLP1-RA agents to help guide physicians in having informed risk-benefit discussions |
| **Methods** | | | |  |
| Study design | 4 | Present key elements of study design early in the paper |  | We conducted a retrospective analysis using data from the FDA Adverse Event Reporting System (FAERS), a publicly available database that collects post-marketing adverse event reports from January 1st, 2005, to February 17th, 2026, was included. A disproportionality analysis was performed using Proportional Reporting Ratios (PRRs) and Relative Odds Ratios (RORs) to assess the relative reporting frequency of biliary adverse events associated with each GLP-1 receptor agonist compared with semaglutide. |
| Setting | 5 | Describe the setting, locations, and relevant dates, including periods of recruitment, exposure, follow-up, and data collection |  | We conducted a retrospective analysis using data from the FDA Adverse Event Reporting System (FAERS), a publicly available database that collects post-marketing adverse event reports submitted by healthcare professionals, manufacturers, and consumers. FAERS data from January 1st, 2005, to February 17th, 2026, was included. |
| Participants | 6 | (*a*) *Cohort study*—Give the eligibility criteria, and the sources and methods of selection of participants. Describe methods of follow-up  *Case-control study*—Give the eligibility criteria, and the sources and methods of case ascertainment and control selection. Give the rationale for the choice of cases and controls  *Cross-sectional study*—Give the eligibility criteria, and the sources and methods of selection of participants |  | The analysis focused on GLP-1 receptor agonists approved for the treatment of type 2 diabetes mellitus and obesity. We evaluated dulaglutide, exenatide, liraglutide, and tirzepatide, and used semaglutide as the reference agent given its widespread clinical use. Biliary adverse events were grouped into the following clinically relevant categories; cholelithiasis, cholecystitis, biliary colic, bile duct stone and cholangitis. FAERS data from January 1st, 2005, to February 17th, 2026, was included. |
| (*b*)*Cohort study*—For matched studies, give matching criteria and number of exposed and unexposed  *Case-control study*—For matched studies, give matching criteria and the number of controls per case | N/A | Not applicable: no matching performed (disproportionality analysis of FAERS reports). |
| Variables | 7 | Clearly define all outcomes, exposures, predictors, potential confounders, and effect modifiers. Give diagnostic criteria, if applicable |  | The analysis focused on GLP-1 receptor agonists approved for the treatment of type 2 diabetes mellitus and obesity. We evaluated dulaglutide, exenatide, liraglutide, and tirzepatide, and used semaglutide as the reference agent given its widespread clinical use. Biliary adverse events were grouped into the following clinically relevant categories; cholelithiasis, cholecystitis, biliary colic, bile duct stone and cholangitis. Reports listing one of the study drugs and containing one of the mentioned biliary adverse events were included in the analysis. We performed a sub-group analysis on the deduplicated data on age, sex and indication for use. Unknown values were excluded from the analysis. |
| Data sources/ measurement | 8* | For each variable of interest, give sources of data and details of methods of assessment (measurement). Describe comparability of assessment methods if there is more than one group |  | We conducted a retrospective analysis using data from the FDA Adverse Event Reporting System (FAERS), a publicly available database that collects post-marketing adverse event reports submitted by healthcare professionals, manufacturers, and consumers8. FAERS data from January 1st, 2005, to February 17th, 2026, was included. ADRs are categorized using standardized medical terminology from the Medical Dictionary for Regulatory Activities (MedDRA). Deduplication of reports was performed by conditional formatting for variables including patient age, sex, active drug ingredient, country, date of report and drug reactions. |
| Bias | 9 | Describe any efforts to address potential sources of bias |  | We performed deduplication, to reduce duplicate reporting. Additionally, PRR was confirmed with ROR. |
| Study size | 10 | Explain how the study size was arrived at |  | We analyzed a total of 3,460 de-duplicated adverse event reports across 5 biliary conditions for five GLP-1RA drugs. Of these, semaglutide accounted for 1797 reports, tirzepatide 1363, liraglutide 1033, exenatide 999 and dulaglutide 574. .Semaglutide was used as the reference drug. |

Continued on next page

| Quantitative variables | 11 | Explain how quantitative variables were handled in the analyses. If applicable, describe which groupings were chosen and why |  | We stratified the data based on reporter type, route and indication for use. 3219 (93.3%) reports were from manufacturers, 103 (3%) from healthcare providers, 102 (2.9%) from patients and 36 (1%) unknown. There were 3162 (91.4%) reports of injection use, 81(2.3 %) of oral, 20 (0.6%) of mixed and 197(5.7%) unknown. 1448 (41.8%) reports of use for type 2 diabetes, 835 (24.1%) for obesity, 122 (3.5%) for both and 1055 (30.5%) unknown. Data was also stratified based on age and sex, the most common age group for GLP-1RA ADR reports was 45-64 years (1153 reports) followed by 18-44 years (653 reports). Females had a higher number of ADR reports as compared to males (2094 vs 1129 reports). |
| --- | --- | --- | --- | --- |
| Statistical methods | 12 | (*a*) Describe all statistical methods, including those used to control for confounding |  | A disproportionality analysis was performed using Proportional Reporting Ratios (PRRs) to assess the relative reporting frequency of biliary adverse events associated with each GLP-1 receptor agonist compared with semaglutide. For each adverse event category, PRRs were calculated by comparing the proportion of reports for a given event among users of an individual GLP-1RA with the proportion of the same adverse event reported among semaglutide users. Additionally, Reporting Odds Ratios (RORs) was performed on the same data to validate the findings. We used the standard error of the log-PRR to calculate 95% confidence intervals (CIs). A 2-sided Fisher exact p test was used to determine statistical significance, with p < 0.05 considered significant. |
| (*b*) Describe any methods used to examine subgroups and interactions |  | We performed a sub-group analysis on the deduplicated data on age, sex and indication for use. Unknown values were excluded from the analysis. Breslow–Day heterogeneity tests were used to detect heterogeneity across strata with p<0.05 considered a signal for heterogeneity. |
| (*c*) Explain how missing data were addressed |  | We performed a sub-group analysis on the deduplicated data on age, sex and indication for use. Unknown values were excluded from the analysis. Breslow–Day heterogeneity tests were used to detect heterogeneity across strata with p<0.05 considered a signal for heterogeneity. |
| (*d*) *Cohort study*—If applicable, explain how loss to follow-up was addressed  *Case-control study*—If applicable, explain how matching of cases and controls was addressed  *Cross-sectional study*—If applicable, describe analytical methods taking account of sampling strategy | N/A | Not applicable |
| (*e*) Describe any sensitivity analyses |  | To assess robustness of results, we performed a sensitivity analysis. We repeated the disproportionality analysis by (i) excluding reports with unknown indication for use, (ii) restricting to U.S. reports geographically. reports geographically |
| **Results** | | | | |
| Participants | 13* | (a) Report numbers of individuals at each stage of study—eg numbers potentially eligible, examined for eligibility, confirmed eligible, included in the study, completing follow-up, and analysed |  | We analyzed a total of 3,460 de-duplicated adverse event reports across 5 biliary conditions for five GLP-1RA drugs. Of these, semaglutide accounted for 1797 reports, tirzepatide 1363, liraglutide 1033, exenatide 999 and dulaglutide 574. (Table 1) Semaglutide was used as the reference drug. See also Table 1 and Table 2 for counts and excluded duplicates. |
| (b) Give reasons for non-participation at each stage |  | Duplicates removed as per Table 2; unknown values were excluded from subgroup analyses. |
| (c) Consider use of a flow diagram | N/A | Flow diagram not included. |
| Descriptive data | 14* | (a) Give characteristics of study participants (eg demographic, clinical, social) and information on exposures and potential confounders |  | We stratified the data based on reporter type, route and indication for use. 3219 (93.3%) reports were from manufacturers, 103 (3%) from healthcare providers, 102 (2.9%) from patients and 36 (1%) unknown. There were 3162 (91.4%) reports of injection use, 81(2.3 %) of oral, 20 (0.6%) of mixed and 197(5.7%) unknown. 1448 (41.8%) reports of use for type 2 diabetes, 835 (24.1%) for obesity, 122 (3.5%) for both and 1055 (30.5%) unknown. Data was also stratified based on age and sex, the most common age group for GLP-1RA ADR reports was 45-64 years (1153 reports) followed by 18-44 years (653 reports). Females had a higher number of ADR reports as compared to males (2094 vs 1129 reports). See also Table 4 (sex distribution) and Table 5 (age distribution). |
| (b) Indicate number of participants with missing data for each variable of interest |  | Duplicates removed as per Table 1 and 2; unknown values were excluded from subgroup analyses. |
| (c) *Cohort study*—Summarise follow-up time (eg, average and total amount) | N/A | Not applicable |
| Outcome data | 15* | *Cohort study*—Report numbers of outcome events or summary measures over time | N/A | Not applicable |
| *Case-control study—*Report numbers in each exposure category, or summary measures of exposure | N/A | Not applicable |
| *Cross-sectional study—*Report numbers of outcome events or summary measures |  | Outcome event counts are reported as numbers of ADR reports by biliary condition and drug (Table 1) and summarized in Results. |
| Main results | 16 | (*a*) Give unadjusted estimates and, if applicable, confounder-adjusted estimates and their precision (eg, 95% confidence interval). Make clear which confounders were adjusted for and why they were included |  | For bile duct stone, exenatide (PRR 0.39 (0.23–0.65), ROR 0.37 (0.22–0.63), p<0.001) and tirzepatide (PRR 0.58 (0.39–0.84), ROR 0.56 (0.37–0.83), p= 0.004) showed significantly lower reporting compared to semaglutide. For biliary colic, dulaglutide (PRR 0.50 (0.30–0.82), ROR 0.46 (0.27–0.79), p=0.003) and exenatide (PRR 0.30 (0.19–0.47), ROR 0.27 (0.17–0.44), p<0.001) demonstrated significantly lower relative reporting compared to semaglutide. For cholangitis, dulaglutide (PRR 1.65 (1.05–2.60), ROR 1.71 (1.04–2.81), p=0.045) showed significantly higher reporting relative to semaglutide. (See Table 3 for PRR/ROR estimates with 95% CIs and Fisher p-values.) |
| (*b*) Report category boundaries when continuous variables were categorized | N/A | . |
| (*c*) If relevant, consider translating estimates of relative risk into absolute risk for a meaningful time period | N/A | N/A |

Continued on next page

| Other analyses | 17 | Report other analyses done—eg analyses of subgroups and interactions, and sensitivity analyses |  | We performed a sub-group analysis on the deduplicated data on age, sex and indication for use. Unknown values were excluded from the analysis. Breslow–Day heterogeneity tests were used to detect heterogeneity across strata with p<0.05 considered a signal for heterogeneity. (Refer supplementary material table 2) |
| --- | --- | --- | --- | --- |
| **Discussion** | | | | |
| Key results | 18 | Summarise key results with reference to study objectives |  | In our FAERS-based disproportionality analysis, we observed that biliary adverse events are not consistent across all individual GLP-1RAs. Specifically, dulaglutide and exenatide had lower relative reporting of biliary colic and bile duct stone; exenatide, liraglutide, and tirzepatide had higher relative reporting of cholecystitis. Similarly, dulaglutide demonstrated higher relative reporting of cholangitis, and exenatide, liraglutide and tirzepatide showed higher relative reporting of cholelithiasis. These results align with recent studies showing similar variability across individual GLP-1RAs rather than the same pattern across all agents. |
| Limitations | 19 | Discuss limitations of the study, taking into account sources of potential bias or imprecision. Discuss both direction and magnitude of any potential bias |  | While FAERS remains an important post-marketing surveillance dataset, it is important to highlight that our study had a few limitations. Firstly, the FAERS database is a voluntary reporting database that can be subject to underreporting or incomplete reports. Secondly, the database does not include patient factors (co-morbidities, BMI, concurrent medication use or lab abnormalities) that could potentially lead to confounding. However, our within-class comparator approach (drug vs the remainder of the GLP-1RA class) aided to partially reduce confounding within the class level, while still allowing detection of drug-specific patterns. Thirdly, the database lacks crucial information on drug dosage, frequency and duration. Lastly, disproportionality reporting, including PRR and ROR is best suited for signal detection rather than measurement of incidence. |
| Interpretation | 20 | Give a cautious overall interpretation of results considering objectives, limitations, multiplicity of analyses, results from similar studies, and other relevant evidence |  | In our FAERS-based disproportionality analysis, we observed that biliary adverse events are not consistent across all individual GLP-1RAs. Specifically, dulaglutide and exenatide had lower relative reporting of biliary colic and bile duct stone; exenatide, liraglutide, and tirzepatide had higher relative reporting of cholecystitis. Similarly, dulaglutide demonstrated higher relative reporting of cholangitis, and exenatide, liraglutide and tirzepatide showed higher relative reporting of cholelithiasis. These results align with recent studies showing similar variability across individual GLP-1RAs rather than the same pattern across all agents. Despite these, there is consistency noted between our findings and previous trials and studies, which strengthens the credibility of the patterns observed in our study. |
| Generalisability | 21 | Discuss the generalisability (external validity) of the study results |  | There is consistency noted between our findings and previous trials and studies, which strengthens the credibility of the patterns observed in our study. |
| **Other information** | |  | | |
| Funding | 22 | Give the source of funding and the role of the funders for the present study and, if applicable, for the original study on which the present article is based | N/A | N/A |

*Give information separately for cases and controls in case-control studies and, if applicable, for exposed and unexposed groups in cohort and cross-sectional studies.

**Note:** An Explanation and Elaboration article discusses each checklist item and gives methodological background and published examples of transparent reporting. The STROBE checklist is best used in conjunction with this article (freely available on the Web sites of PLoS Medicine at http://www.plosmedicine.org/, Annals of Internal Medicine at http://www.annals.org/, and Epidemiology at http://www.epidem.com/). Information on the STROBE Initiative is available at www.strobe-statement.org.

**Supplementary material Table 2-Subgroup analysis by sex, age and indication for use**

| **Subgroup** | **Stratum** | **ADR** | **Comparator** | **Comparator total (a+b)** | **Semaglutide total (c+d)** | **a: events (comparator)** | **b: non-events (comparator)** | **c: events (semaglutide)** | **d: non-events (semaglutide)** | **PRR (95% CI)** | **ROR (95% CI)** | **Fisher P** | **Breslow–Day P** |
| --- | --- | --- | --- | --- | --- | --- | --- | --- | --- | --- | --- | --- | --- |
| Sex | Female | Bile duct stone | tirzepatide | 935 | 1,223 | 21 | 914 | 39 | 1,184 | 0.70 (0.42–1.19) | 0.70 (0.41–1.19) | 0.234 | 0.252 |
| Sex | Male | Bile duct stone | tirzepatide | 317 | 608 | 10 | 307 | 44 | 564 | 0.44 (0.22–0.85) | 0.42 (0.21–0.84) | 0.012 | 0.252 |
| Sex | Female | Bile duct stone | liraglutide | 745 | 1,223 | 26 | 719 | 39 | 1,184 | 1.09 (0.67–1.78) | 1.10 (0.66–1.82) | 0.699 | 0.031 |
| Sex | Male | Bile duct stone | liraglutide | 308 | 608 | 10 | 298 | 44 | 564 | 0.45 (0.23–0.88) | 0.43 (0.21–0.87) | 0.017 | 0.031 |
| Sex | Female | Bile duct stone | exenatide | 555 | 1,223 | 12 | 543 | 39 | 1,184 | 0.68 (0.36–1.28) | 0.67 (0.35–1.29) | 0.283 | 0.014 |
| Sex | Male | Bile duct stone | exenatide | 433 | 608 | 6 | 427 | 44 | 564 | 0.19 (0.08–0.45) | 0.18 (0.08–0.43) | <0.001 | 0.014 |
| Sex | Female | Bile duct stone | dulaglutide | 289 | 1,223 | 7 | 282 | 39 | 1,184 | 0.76 (0.34–1.68) | 0.75 (0.33–1.70) | 0.573 | 0.679 |
| Sex | Male | Bile duct stone | dulaglutide | 245 | 608 | 11 | 234 | 44 | 564 | 0.62 (0.33–1.18) | 0.60 (0.31–1.19) | 0.166 | 0.679 |
| Sex | Female | Biliary colic | tirzepatide | 935 | 1,223 | 63 | 872 | 94 | 1,129 | 0.88 (0.64–1.19) | 0.87 (0.62–1.21) | 0.452 | 0.272 |
| Sex | Male | Biliary colic | tirzepatide | 317 | 608 | 8 | 309 | 28 | 580 | 0.55 (0.25–1.19) | 0.54 (0.24–1.19) | 0.152 | 0.272 |
| Sex | Female | Biliary colic | liraglutide | 745 | 1,223 | 46 | 699 | 94 | 1,129 | 0.80 (0.57–1.13) | 0.79 (0.55–1.14) | 0.240 | 0.942 |
| Sex | Male | Biliary colic | liraglutide | 308 | 608 | 11 | 297 | 28 | 580 | 0.78 (0.39–1.54) | 0.77 (0.38–1.56) | 0.604 | 0.942 |
| Sex | Female | Biliary colic | exenatide | 555 | 1,223 | 14 | 541 | 94 | 1,129 | 0.33 (0.19–0.57) | 0.31 (0.18–0.55) | <0.001 | 0.903 |
| Sex | Male | Biliary colic | exenatide | 433 | 608 | 6 | 427 | 28 | 580 | 0.30 (0.13–0.72) | 0.29 (0.12–0.71) | 0.004 | 0.903 |
| Sex | Female | Biliary colic | dulaglutide | 289 | 1,223 | 9 | 280 | 94 | 1,129 | 0.41 (0.21–0.79) | 0.39 (0.19–0.77) | 0.004 | 0.858 |
| Sex | Male | Biliary colic | dulaglutide | 245 | 608 | 4 | 241 | 28 | 580 | 0.35 (0.13–1.00) | 0.34 (0.12–0.99) | 0.045 | 0.858 |
| Sex | Female | Cholangitis | tirzepatide | 935 | 1,223 | 23 | 912 | 29 | 1,194 | 1.04 (0.60–1.78) | 1.04 (0.60–1.81) | 0.888 | 0.146 |
| Sex | Male | Cholangitis | tirzepatide | 317 | 608 | 26 | 291 | 28 | 580 | 1.78 (1.06–2.98) | 1.85 (1.07–3.21) | 0.038 | 0.146 |
| Sex | Female | Cholangitis | liraglutide | 745 | 1,223 | 17 | 728 | 29 | 1,194 | 0.96 (0.53–1.74) | 0.96 (0.52–1.76) | 1.000 | 0.911 |
| Sex | Male | Cholangitis | liraglutide | 308 | 608 | 13 | 295 | 28 | 580 | 0.92 (0.48–1.74) | 0.91 (0.47–1.79) | 0.867 | 0.911 |
| Sex | Female | Cholangitis | exenatide | 555 | 1,223 | 18 | 537 | 29 | 1,194 | 1.37 (0.77–2.44) | 1.38 (0.76–2.51) | 0.338 | 0.124 |
| Sex | Male | Cholangitis | exenatide | 433 | 608 | 14 | 419 | 28 | 580 | 0.70 (0.37–1.32) | 0.69 (0.36–1.33) | 0.338 | 0.124 |
| Sex | Female | Cholangitis | dulaglutide | 289 | 1,223 | 13 | 276 | 29 | 1,194 | 1.90 (1.00–3.60) | 1.94 (1.00–3.78) | 0.070 | 0.287 |
| Sex | Male | Cholangitis | dulaglutide | 245 | 608 | 13 | 232 | 28 | 580 | 1.15 (0.61–2.19) | 1.16 (0.59–2.28) | 0.724 | 0.287 |
| Sex | Female | Cholecystitis | tirzepatide | 935 | 1,223 | 473 | 462 | 621 | 602 | 1.00 (0.92–1.08) | 0.99 (0.84–1.18) | 0.965 | 0.634 |
| Sex | Male | Cholecystitis | tirzepatide | 317 | 608 | 175 | 142 | 325 | 283 | 1.03 (0.91–1.17) | 1.07 (0.82–1.41) | 0.627 | 0.634 |
| Sex | Female | Cholecystitis | liraglutide | 745 | 1,223 | 370 | 375 | 621 | 602 | 0.98 (0.89–1.07) | 0.96 (0.80–1.15) | 0.642 | 0.770 |
| Sex | Male | Cholecystitis | liraglutide | 308 | 608 | 165 | 143 | 325 | 283 | 1.00 (0.88–1.14) | 1.00 (0.76–1.32) | 1.000 | 0.770 |
| Sex | Female | Cholecystitis | exenatide | 555 | 1,223 | 289 | 266 | 621 | 602 | 1.03 (0.93–1.13) | 1.05 (0.86–1.29) | 0.645 | 0.730 |
| Sex | Male | Cholecystitis | exenatide | 433 | 608 | 231 | 202 | 325 | 283 | 1.00 (0.89–1.12) | 1.00 (0.78–1.27) | 1.000 | 0.730 |
| Sex | Female | Cholecystitis | dulaglutide | 289 | 1,223 | 153 | 136 | 621 | 602 | 1.04 (0.92–1.18) | 1.09 (0.84–1.41) | 0.514 | 0.500 |
| Sex | Male | Cholecystitis | dulaglutide | 245 | 608 | 128 | 117 | 325 | 283 | 0.98 (0.85–1.13) | 0.95 (0.71–1.28) | 0.762 | 0.500 |
| Sex | Female | Cholelithiasis | tirzepatide | 935 | 1,223 | 355 | 580 | 440 | 783 | 1.06 (0.94–1.18) | 1.09 (0.91–1.30) | 0.345 | 0.789 |
| Sex | Male | Cholelithiasis | tirzepatide | 317 | 608 | 98 | 219 | 183 | 425 | 1.03 (0.84–1.26) | 1.04 (0.77–1.40) | 0.821 | 0.789 |
| Sex | Female | Cholelithiasis | liraglutide | 745 | 1,223 | 286 | 459 | 440 | 783 | 1.07 (0.95–1.20) | 1.11 (0.92–1.34) | 0.290 | 0.437 |
| Sex | Male | Cholelithiasis | liraglutide | 308 | 608 | 109 | 199 | 183 | 425 | 1.18 (0.97–1.43) | 1.27 (0.95–1.70) | 0.115 | 0.437 |
| Sex | Female | Cholelithiasis | exenatide | 555 | 1,223 | 222 | 333 | 440 | 783 | 1.11 (0.98–1.26) | 1.19 (0.97–1.46) | 0.112 | 0.082 |
| Sex | Male | Cholelithiasis | exenatide | 433 | 608 | 176 | 257 | 183 | 425 | 1.35 (1.14–1.59) | 1.59 (1.23–2.06) | <0.001 | 0.082 |
| Sex | Female | Cholelithiasis | dulaglutide | 289 | 1,223 | 107 | 182 | 440 | 783 | 1.03 (0.87–1.22) | 1.05 (0.80–1.36) | 0.734 | 0.259 |
| Sex | Male | Cholelithiasis | dulaglutide | 245 | 608 | 89 | 156 | 183 | 425 | 1.21 (0.98–1.48) | 1.32 (0.97–1.81) | 0.088 | 0.259 |
| Age | <45 | Bile duct stone | tirzepatide | 413 | 418 | 11 | 402 | 7 | 411 | 1.59 (0.62–4.06) | 1.61 (0.62–4.19) | 0.351 | 0.080 |
| Age | 45–64 | Bile duct stone | tirzepatide | 448 | 681 | 8 | 440 | 23 | 658 | 0.53 (0.24–1.17) | 0.52 (0.23–1.17) | 0.136 | 0.080 |
| Age | ≥65 | Bile duct stone | tirzepatide | 129 | 404 | 6 | 123 | 43 | 361 | 0.44 (0.19–1.00) | 0.41 (0.17–0.99) | 0.053 | 0.080 |
| Age | <45 | Bile duct stone | liraglutide | 280 | 418 | 8 | 272 | 7 | 411 | 1.71 (0.63–4.65) | 1.73 (0.62–4.82) | 0.300 | 0.027 |
| Age | 45–64 | Bile duct stone | liraglutide | 367 | 681 | 13 | 354 | 23 | 658 | 1.05 (0.54–2.05) | 1.05 (0.53–2.10) | 0.861 | 0.027 |
| Age | ≥65 | Bile duct stone | liraglutide | 212 | 404 | 9 | 203 | 43 | 361 | 0.40 (0.20–0.80) | 0.37 (0.18–0.78) | 0.006 | 0.027 |
| Age | <45 | Bile duct stone | exenatide | 69 | 418 | 1 | 68 | 7 | 411 | 0.87 (0.11–6.93) | 0.86 (0.10–7.13) | 1.000 | 0.049 |
| Age | 45–64 | Bile duct stone | exenatide | 416 | 681 | 9 | 407 | 23 | 658 | 0.64 (0.30–1.37) | 0.63 (0.29–1.38) | 0.273 | 0.049 |
| Age | ≥65 | Bile duct stone | exenatide | 235 | 404 | 4 | 231 | 43 | 361 | 0.16 (0.06–0.44) | 0.15 (0.05–0.41) | <0.001 | 0.049 |
| Age | <45 | Bile duct stone | dulaglutide | 65 | 418 | 0 | 65 | 7 | 411 |  |  | 0.601 | 0.215 |
| Age | 45–64 | Bile duct stone | dulaglutide | 188 | 681 | 1 | 187 | 23 | 658 | 0.16 (0.02–1.16) | 0.15 (0.02–1.14) | 0.041 | 0.215 |
| Age | ≥65 | Bile duct stone | dulaglutide | 157 | 404 | 14 | 143 | 43 | 361 | 0.84 (0.47–1.49) | 0.82 (0.44–1.55) | 0.641 | 0.215 |
| Age | <45 | Biliary colic | tirzepatide | 413 | 418 | 37 | 376 | 39 | 379 | 0.96 (0.63–1.47) | 0.96 (0.60–1.53) | 0.904 | 0.885 |
| Age | 45–64 | Biliary colic | tirzepatide | 448 | 681 | 19 | 429 | 36 | 645 | 0.80 (0.47–1.38) | 0.79 (0.45–1.40) | 0.481 | 0.885 |
| Age | ≥65 | Biliary colic | tirzepatide | 129 | 404 | 4 | 125 | 14 | 390 | 0.89 (0.30–2.67) | 0.89 (0.29–2.76) | 1.000 | 0.885 |
| Age | <45 | Biliary colic | liraglutide | 280 | 418 | 30 | 250 | 39 | 379 | 1.15 (0.73–1.80) | 1.17 (0.71–1.93) | 0.605 | 0.107 |
| Age | 45–64 | Biliary colic | liraglutide | 367 | 681 | 9 | 358 | 36 | 645 | 0.46 (0.23–0.95) | 0.45 (0.21–0.95) | 0.037 | 0.107 |
| Age | ≥65 | Biliary colic | liraglutide | 212 | 404 | 6 | 206 | 14 | 390 | 0.82 (0.32–2.09) | 0.81 (0.31–2.14) | 0.813 | 0.107 |
| Age | <45 | Biliary colic | exenatide | 69 | 418 | 1 | 68 | 39 | 379 | 0.16 (0.02–1.11) | 0.14 (0.02–1.06) | 0.030 | 0.005 |
| Age | 45–64 | Biliary colic | exenatide | 416 | 681 | 5 | 411 | 36 | 645 | 0.23 (0.09–0.57) | 0.22 (0.08–0.56) | <0.001 | 0.005 |
| Age | ≥65 | Biliary colic | exenatide | 235 | 404 | 10 | 225 | 14 | 390 | 1.23 (0.55–2.72) | 1.24 (0.54–2.83) | 0.668 | 0.005 |
| Age | <45 | Biliary colic | dulaglutide | 65 | 418 | 2 | 63 | 39 | 379 | 0.33 (0.08–1.33) | 0.31 (0.07–1.31) | 0.146 | 0.697 |
| Age | 45–64 | Biliary colic | dulaglutide | 188 | 681 | 6 | 182 | 36 | 645 | 0.60 (0.26–1.41) | 0.59 (0.25–1.42) | 0.335 | 0.697 |
| Age | ≥65 | Biliary colic | dulaglutide | 157 | 404 | 2 | 155 | 14 | 390 | 0.37 (0.08–1.60) | 0.36 (0.08–1.60) | 0.257 | 0.697 |
| Age | <45 | Cholangitis | tirzepatide | 413 | 418 | 6 | 407 | 7 | 411 | 0.87 (0.29–2.56) | 0.87 (0.29–2.60) | 1.000 | 0.509 |
| Age | 45–64 | Cholangitis | tirzepatide | 448 | 681 | 19 | 429 | 16 | 665 | 1.81 (0.94–3.47) | 1.84 (0.94–3.62) | 0.081 | 0.509 |
| Age | ≥65 | Cholangitis | tirzepatide | 129 | 404 | 13 | 116 | 27 | 377 | 1.51 (0.80–2.83) | 1.56 (0.78–3.13) | 0.248 | 0.509 |
| Age | <45 | Cholangitis | liraglutide | 280 | 418 | 2 | 278 | 7 | 411 | 0.43 (0.09–2.04) | 0.42 (0.09–2.05) | 0.327 | 0.436 |
| Age | 45–64 | Cholangitis | liraglutide | 367 | 681 | 11 | 356 | 16 | 665 | 1.28 (0.60–2.72) | 1.28 (0.59–2.80) | 0.544 | 0.436 |
| Age | ≥65 | Cholangitis | liraglutide | 212 | 404 | 13 | 199 | 27 | 377 | 0.92 (0.48–1.74) | 0.91 (0.46–1.81) | 0.865 | 0.436 |
| Age | <45 | Cholangitis | exenatide | 69 | 418 | 0 | 69 | 7 | 411 |  |  | 0.601 | 0.958 |
| Age | 45–64 | Cholangitis | exenatide | 416 | 681 | 6 | 410 | 16 | 665 | 0.61 (0.24–1.56) | 0.61 (0.24–1.57) | 0.377 | 0.958 |
| Age | ≥65 | Cholangitis | exenatide | 235 | 404 | 9 | 226 | 27 | 377 | 0.57 (0.27–1.20) | 0.56 (0.26–1.20) | 0.156 | 0.958 |
| Age | <45 | Cholangitis | dulaglutide | 65 | 418 | 0 | 65 | 7 | 411 |  |  | 0.601 | 0.269 |
| Age | 45–64 | Cholangitis | dulaglutide | 188 | 681 | 4 | 184 | 16 | 665 | 0.91 (0.31–2.68) | 0.90 (0.30–2.74) | 1.000 | 0.269 |
| Age | ≥65 | Cholangitis | dulaglutide | 157 | 404 | 20 | 137 | 27 | 377 | 1.91 (1.10–3.30) | 2.04 (1.11–3.75) | 0.027 | 0.269 |
| Age | <45 | Cholecystitis | tirzepatide | 413 | 418 | 199 | 214 | 223 | 195 | 0.90 (0.79–1.03) | 0.81 (0.62–1.07) | 0.145 | 0.155 |
| Age | 45–64 | Cholecystitis | tirzepatide | 448 | 681 | 243 | 205 | 366 | 315 | 1.01 (0.90–1.13) | 1.02 (0.80–1.30) | 0.903 | 0.155 |
| Age | ≥65 | Cholecystitis | tirzepatide | 129 | 404 | 72 | 57 | 200 | 204 | 1.13 (0.94–1.35) | 1.29 (0.86–1.92) | 0.226 | 0.155 |
| Age | <45 | Cholecystitis | liraglutide | 280 | 418 | 136 | 144 | 223 | 195 | 0.91 (0.78–1.06) | 0.83 (0.61–1.12) | 0.218 | 0.505 |
| Age | 45–64 | Cholecystitis | liraglutide | 367 | 681 | 192 | 175 | 366 | 315 | 0.97 (0.86–1.10) | 0.94 (0.73–1.22) | 0.697 | 0.505 |
| Age | ≥65 | Cholecystitis | liraglutide | 212 | 404 | 109 | 103 | 200 | 204 | 1.04 (0.88–1.22) | 1.08 (0.77–1.51) | 0.672 | 0.505 |
| Age | <45 | Cholecystitis | exenatide | 69 | 418 | 40 | 29 | 223 | 195 | 1.09 (0.87–1.35) | 1.21 (0.72–2.02) | 0.516 | 0.615 |
| Age | 45–64 | Cholecystitis | exenatide | 416 | 681 | 220 | 196 | 366 | 315 | 0.98 (0.88–1.10) | 0.97 (0.76–1.23) | 0.803 | 0.615 |
| Age | ≥65 | Cholecystitis | exenatide | 235 | 404 | 124 | 111 | 200 | 204 | 1.07 (0.91–1.25) | 1.14 (0.83–1.57) | 0.460 | 0.615 |
| Age | <45 | Cholecystitis | dulaglutide | 65 | 418 | 37 | 28 | 223 | 195 | 1.07 (0.85–1.34) | 1.16 (0.68–1.96) | 0.689 | 0.860 |
| Age | 45–64 | Cholecystitis | dulaglutide | 188 | 681 | 100 | 88 | 366 | 315 | 0.99 (0.85–1.15) | 0.98 (0.71–1.35) | 0.934 | 0.860 |
| Age | ≥65 | Cholecystitis | dulaglutide | 157 | 404 | 80 | 77 | 200 | 204 | 1.03 (0.86–1.24) | 1.06 (0.73–1.53) | 0.778 | 0.860 |
| Age | <45 | Cholelithiasis | tirzepatide | 413 | 418 | 160 | 253 | 142 | 276 | 1.14 (0.95–1.37) | 1.23 (0.93–1.63) | 0.171 | 0.339 |
| Age | 45–64 | Cholelithiasis | tirzepatide | 448 | 681 | 159 | 289 | 240 | 441 | 1.01 (0.86–1.18) | 1.01 (0.79–1.30) | 0.949 | 0.339 |
| Age | ≥65 | Cholelithiasis | tirzepatide | 129 | 404 | 34 | 95 | 120 | 284 | 0.89 (0.64–1.23) | 0.85 (0.54–1.32) | 0.504 | 0.339 |
| Age | <45 | Cholelithiasis | liraglutide | 280 | 418 | 104 | 176 | 142 | 276 | 1.09 (0.89–1.34) | 1.15 (0.84–1.58) | 0.419 | 0.857 |
| Age | 45–64 | Cholelithiasis | liraglutide | 367 | 681 | 142 | 225 | 240 | 441 | 1.10 (0.93–1.29) | 1.16 (0.89–1.51) | 0.282 | 0.857 |
| Age | ≥65 | Cholelithiasis | liraglutide | 212 | 404 | 75 | 137 | 120 | 284 | 1.19 (0.94–1.51) | 1.30 (0.91–1.84) | 0.171 | 0.857 |
| Age | <45 | Cholelithiasis | exenatide | 69 | 418 | 27 | 42 | 142 | 276 | 1.15 (0.83–1.59) | 1.25 (0.74–2.11) | 0.415 | 0.923 |
| Age | 45–64 | Cholelithiasis | exenatide | 416 | 681 | 176 | 240 | 240 | 441 | 1.20 (1.03–1.40) | 1.35 (1.05–1.73) | 0.021 | 0.923 |
| Age | ≥65 | Cholelithiasis | exenatide | 235 | 404 | 88 | 147 | 120 | 284 | 1.26 (1.01–1.58) | 1.42 (1.01–1.99) | 0.054 | 0.923 |
| Age | <45 | Cholelithiasis | dulaglutide | 65 | 418 | 26 | 39 | 142 | 276 | 1.18 (0.85–1.63) | 1.30 (0.76–2.21) | 0.401 | 0.249 |
| Age | 45–64 | Cholelithiasis | dulaglutide | 188 | 681 | 77 | 111 | 240 | 441 | 1.16 (0.95–1.42) | 1.27 (0.92–1.77) | 0.171 | 0.249 |
| Age | ≥65 | Cholelithiasis | dulaglutide | 157 | 404 | 41 | 116 | 120 | 284 | 0.88 (0.65–1.19) | 0.84 (0.55–1.27) | 0.467 | 0.249 |
| Indication | Type 2 diabetes | Bile duct stone | tirzepatide | 134 | 308 | 5 | 129 | 34 | 274 | 0.34 (0.14–0.85) | 0.31 (0.12–0.82) | 0.011 | 0.397 |
| Indication | Obesity | Bile duct stone | tirzepatide | 273 | 262 | 10 | 263 | 26 | 236 | 0.37 (0.18–0.75) | 0.35 (0.16–0.73) | 0.005 | 0.397 |
| Indication | Both | Bile duct stone | tirzepatide | 13 | 42 | 1 | 12 | 2 | 40 | 1.62 (0.16–16.41) | 1.67 (0.14–20.02) | 0.562 | 0.397 |
| Indication | Type 2 diabetes | Bile duct stone | liraglutide | 182 | 308 | 7 | 175 | 34 | 274 | 0.35 (0.16–0.77) | 0.32 (0.14–0.74) | 0.006 | 0.172 |
| Indication | Obesity | Bile duct stone | liraglutide | 164 | 262 | 13 | 151 | 26 | 236 | 0.80 (0.42–1.51) | 0.78 (0.39–1.57) | 0.605 | 0.172 |
| Indication | Both | Bile duct stone | liraglutide | 3 | 42 | 0 | 3 | 2 | 40 | 2.15 (0.12–37.48) | 2.31 (0.09–58.32) | 1.000 | 0.172 |
| Indication | Type 2 diabetes | Bile duct stone | exenatide | 322 | 308 | 12 | 310 | 34 | 274 | 0.34 (0.18–0.64) | 0.31 (0.16–0.61) | <0.001 | 0.307 |
| Indication | Obesity | Bile duct stone | exenatide | 4 | 262 | 0 | 4 | 26 | 236 | 0.99 (0.07–14.11) | 0.99 (0.05–18.93) | 1.000 | 0.307 |
| Indication | Both | Bile duct stone | exenatide | 3 | 42 | 0 | 3 | 2 | 40 | 2.15 (0.12–37.48) | 2.31 (0.09–58.32) | 1.000 | 0.307 |
| Indication | Type 2 diabetes | Bile duct stone | dulaglutide | 117 | 308 | 7 | 110 | 34 | 274 | 0.54 (0.25–1.19) | 0.51 (0.22–1.19) | 0.141 | 0.338 |
| Indication | Both | Bile duct stone | dulaglutide | 3 | 42 | 0 | 3 | 2 | 40 | 2.15 (0.12–37.48) | 2.31 (0.09–58.32) | 1.000 | 0.338 |
| Indication | Type 2 diabetes | Biliary colic | tirzepatide | 134 | 308 | 4 | 130 | 25 | 283 | 0.37 (0.13–1.04) | 0.35 (0.12–1.02) | 0.058 | 0.264 |
| Indication | Obesity | Biliary colic | tirzepatide | 273 | 262 | 41 | 232 | 45 | 217 | 0.87 (0.59–1.29) | 0.85 (0.54–1.35) | 0.556 | 0.264 |
| Indication | Both | Biliary colic | tirzepatide | 13 | 42 | 0 | 13 | 4 | 38 | 0.34 (0.02–5.95) | 0.32 (0.02–6.28) | 0.562 | 0.264 |
| Indication | Type 2 diabetes | Biliary colic | liraglutide | 182 | 308 | 11 | 171 | 25 | 283 | 0.74 (0.38–1.48) | 0.73 (0.35–1.52) | 0.475 | 0.902 |
| Indication | Obesity | Biliary colic | liraglutide | 164 | 262 | 25 | 139 | 45 | 217 | 0.89 (0.57–1.39) | 0.87 (0.51–1.48) | 0.687 | 0.902 |
| Indication | Both | Biliary colic | liraglutide | 3 | 42 | 0 | 3 | 4 | 38 | 1.19 (0.08–18.43) | 1.22 (0.05–27.68) | 1.000 | 0.902 |
| Indication | Type 2 diabetes | Biliary colic | exenatide | 322 | 308 | 17 | 305 | 25 | 283 | 0.65 (0.36–1.18) | 0.63 (0.33–1.19) | 0.201 | 0.910 |
| Indication | Obesity | Biliary colic | exenatide | 4 | 262 | 0 | 4 | 45 | 217 | 0.58 (0.04–8.12) | 0.53 (0.03–10.04) | 1.000 | 0.910 |
| Indication | Both | Biliary colic | exenatide | 3 | 42 | 0 | 3 | 4 | 38 | 1.19 (0.08–18.43) | 1.22 (0.05–27.68) | 1.000 | 0.910 |
| Indication | Type 2 diabetes | Biliary colic | dulaglutide | 117 | 308 | 8 | 109 | 25 | 283 | 0.84 (0.39–1.81) | 0.83 (0.36–1.90) | 0.839 | 0.814 |
| Indication | Both | Biliary colic | dulaglutide | 3 | 42 | 0 | 3 | 4 | 38 | 1.19 (0.08–18.43) | 1.22 (0.05–27.68) | 1.000 | 0.814 |
| Indication | Type 2 diabetes | Cholangitis | tirzepatide | 134 | 308 | 19 | 115 | 21 | 287 | 2.08 (1.16–3.74) | 2.26 (1.17–4.36) | 0.018 | 0.128 |
| Indication | Obesity | Cholangitis | tirzepatide | 273 | 262 | 11 | 262 | 13 | 249 | 0.81 (0.37–1.78) | 0.80 (0.35–1.83) | 0.678 | 0.128 |
| Indication | Both | Cholangitis | tirzepatide | 13 | 42 | 1 | 12 | 1 | 41 | 3.23 (0.22–48.13) | 3.42 (0.20–58.80) | 0.420 | 0.128 |
| Indication | Type 2 diabetes | Cholangitis | liraglutide | 182 | 308 | 14 | 168 | 21 | 287 | 1.13 (0.59–2.16) | 1.14 (0.56–2.30) | 0.720 | 0.410 |
| Indication | Obesity | Cholangitis | liraglutide | 164 | 262 | 5 | 159 | 13 | 249 | 0.61 (0.22–1.69) | 0.60 (0.21–1.72) | 0.460 | 0.410 |
| Indication | Both | Cholangitis | liraglutide | 3 | 42 | 0 | 3 | 1 | 41 | 3.58 (0.17–74.33) | 3.95 (0.13–116.26) | 1.000 | 0.410 |
| Indication | Type 2 diabetes | Cholangitis | exenatide | 322 | 308 | 8 | 314 | 21 | 287 | 0.36 (0.16–0.81) | 0.35 (0.15–0.80) | 0.012 | 0.005 |
| Indication | Obesity | Cholangitis | exenatide | 4 | 262 | 1 | 3 | 13 | 249 | 5.04 (0.85–29.82) | 6.38 (0.62–65.68) | 0.195 | 0.005 |
| Indication | Both | Cholangitis | exenatide | 3 | 42 | 0 | 3 | 1 | 41 | 3.58 (0.17–74.33) | 3.95 (0.13–116.26) | 1.000 | 0.005 |
| Indication | Type 2 diabetes | Cholangitis | dulaglutide | 117 | 308 | 12 | 105 | 21 | 287 | 1.50 (0.76–2.96) | 1.56 (0.74–3.29) | 0.231 | 0.588 |
| Indication | Both | Cholangitis | dulaglutide | 3 | 42 | 0 | 3 | 1 | 41 | 3.58 (0.17–74.33) | 3.95 (0.13–116.26) | 1.000 | 0.588 |
| Indication | Type 2 diabetes | Cholecystitis | tirzepatide | 134 | 308 | 53 | 81 | 152 | 156 | 0.80 (0.63–1.02) | 0.67 (0.44–1.01) | 0.062 | 0.609 |
| Indication | Obesity | Cholecystitis | tirzepatide | 273 | 262 | 87 | 186 | 111 | 151 | 0.75 (0.60–0.94) | 0.64 (0.45–0.91) | 0.012 | 0.609 |
| Indication | Both | Cholecystitis | tirzepatide | 13 | 42 | 4 | 9 | 24 | 18 | 0.54 (0.23–1.27) | 0.33 (0.09–1.26) | 0.121 | 0.609 |
| Indication | Type 2 diabetes | Cholecystitis | liraglutide | 182 | 308 | 59 | 123 | 152 | 156 | 0.66 (0.52–0.83) | 0.49 (0.34–0.72) | <0.001 | 0.139 |
| Indication | Obesity | Cholecystitis | liraglutide | 164 | 262 | 59 | 105 | 111 | 151 | 0.85 (0.66–1.09) | 0.76 (0.51–1.14) | 0.222 | 0.139 |
| Indication | Both | Cholecystitis | liraglutide | 3 | 42 | 0 | 3 | 24 | 18 | 0.22 (0.02–2.97) | 0.11 (0.01–2.22) | 0.094 | 0.139 |
| Indication | Type 2 diabetes | Cholecystitis | exenatide | 322 | 308 | 91 | 231 | 152 | 156 | 0.57 (0.47–0.70) | 0.40 (0.29–0.56) | <0.001 | 0.993 |
| Indication | Obesity | Cholecystitis | exenatide | 4 | 262 | 1 | 3 | 111 | 151 | 0.59 (0.11–3.24) | 0.45 (0.05–4.42) | 0.641 | 0.993 |
| Indication | Both | Cholecystitis | exenatide | 3 | 42 | 1 | 2 | 24 | 18 | 0.58 (0.12–2.95) | 0.38 (0.03–4.46) | 0.577 | 0.993 |
| Indication | Type 2 diabetes | Cholecystitis | dulaglutide | 117 | 308 | 41 | 76 | 152 | 156 | 0.71 (0.54–0.93) | 0.55 (0.36–0.86) | 0.009 | 0.760 |
| Indication | Both | Cholecystitis | dulaglutide | 3 | 42 | 1 | 2 | 24 | 18 | 0.58 (0.12–2.95) | 0.38 (0.03–4.46) | 0.577 | 0.760 |
| Indication | Type 2 diabetes | Cholelithiasis | tirzepatide | 134 | 308 | 66 | 68 | 150 | 158 | 1.01 (0.82–1.24) | 1.02 (0.68–1.53) | 0.918 | 0.050 |
| Indication | Obesity | Cholelithiasis | tirzepatide | 273 | 262 | 184 | 89 | 134 | 128 | 1.32 (1.14–1.52) | 1.97 (1.39–2.80) | <0.001 | 0.050 |
| Indication | Both | Cholelithiasis | tirzepatide | 13 | 42 | 10 | 3 | 26 | 16 | 1.24 (0.85–1.82) | 2.05 (0.49–8.59) | 0.506 | 0.050 |
| Indication | Type 2 diabetes | Cholelithiasis | liraglutide | 182 | 308 | 105 | 77 | 150 | 158 | 1.18 (1.00–1.40) | 1.44 (0.99–2.08) | 0.061 | 0.580 |
| Indication | Obesity | Cholelithiasis | liraglutide | 164 | 262 | 107 | 57 | 134 | 128 | 1.28 (1.08–1.50) | 1.79 (1.20–2.68) | 0.005 | 0.580 |
| Indication | Both | Cholelithiasis | liraglutide | 3 | 42 | 3 | 0 | 26 | 16 | 1.42 (0.92–2.20) | 4.36 (0.21–89.88) | 0.542 | 0.580 |
| Indication | Type 2 diabetes | Cholelithiasis | exenatide | 322 | 308 | 234 | 88 | 150 | 158 | 1.49 (1.31–1.70) | 2.80 (2.01–3.90) | <0.001 | 0.804 |
| Indication | Obesity | Cholelithiasis | exenatide | 4 | 262 | 3 | 1 | 134 | 128 | 1.47 (0.82–2.61) | 2.87 (0.29–27.91) | 0.623 | 0.804 |
| Indication | Both | Cholelithiasis | exenatide | 3 | 42 | 2 | 1 | 26 | 16 | 1.08 (0.47–2.48) | 1.23 (0.10–14.70) | 1.000 | 0.804 |
| Indication | Type 2 diabetes | Cholelithiasis | dulaglutide | 117 | 308 | 57 | 60 | 150 | 158 | 1.00 (0.80–1.24) | 1.00 (0.65–1.53) | 1.000 | 0.310 |
| Indication | Both | Cholelithiasis | dulaglutide | 3 | 42 | 3 | 0 | 26 | 16 | 1.42 (0.92–2.20) | 4.36 (0.21–89.88) | 0.542 | 0.310 |

**Supplementary material Table 3-Sensitivity analysis by excluding reports with unknown indication for use and restricting to U.S. reports geographically.**

| **Outcome** | **Comparator (vs semaglutide)** | **Primary analysis** | | | **Sensitivity 1: exclude unknown indication** | | | **Sensitivity 2: U.S. reports only** | | |
| --- | --- | --- | --- | --- | --- | --- | --- | --- | --- | --- |
|  |  | **PRR (95% CI)** | **ROR (95% CI)** | **p-value** | **PRR (95% CI)** | **ROR (95% CI)** | **p-value** | **PRR (95% CI)** | **ROR (95% CI)** | **p-value** |
| **Bile duct stone** | Tirzepatide | 0.59 (0.40–0.86) | 0.57 (0.38–0.85) | 0.006 | 0.46 (0.28–0.75) | 0.43 (0.26–0.73) | 0.001 | 0.54 (0.23–1.25) | 0.53 (0.23–1.26) | 0.177 |
| Bile duct stone | Liraglutide | 0.80 (0.55–1.16) | 0.79 (0.53–1.17) | 0.278 | 0.69 (0.44–1.07) | 0.67 (0.41–1.07) | 0.110 | 1.51 (0.82–2.79) | 1.54 (0.81–2.92) | 0.228 |
| Bile duct stone | Exenatide | 0.46 (0.28–0.75) | 0.44 (0.27–0.74) | 0.001 | 0.42 (0.25–0.72) | 0.40 (0.23–0.70) | <0.001 | 0.78 (0.38–1.62) | 0.77 (0.36–1.65) | 0.583 |
| Bile duct stone | Dulaglutide | 0.72 (0.44–1.18) | 0.70 (0.42–1.18) | 0.224 | 0.47 (0.23–0.96) | 0.45 (0.21–0.95) | 0.035 | 0.40 (0.12–1.33) | 0.40 (0.12–1.33) | 0.163 |
| **Biliary colic** | Tirzepatide | 0.91 (0.71–1.18) | 0.90 (0.68–1.20) | 0.514 | 1.03 (0.74–1.44) | 1.04 (0.72–1.51) | 0.849 | 1.00 (0.61–1.64) | 1.00 (0.59–1.69) | 1.000 |
| Biliary colic | Liraglutide | 0.89 (0.67–1.18) | 0.88 (0.64–1.20) | 0.427 | 0.88 (0.61–1.27) | 0.87 (0.58–1.31) | 0.541 | 0.60 (0.32–1.12) | 0.58 (0.30–1.12) | 0.132 |
| Biliary colic | Exenatide | 0.31 (0.20–0.50) | 0.29 (0.18–0.47) | <0.001 | 0.38 (0.23–0.64) | 0.36 (0.21–0.61) | <0.001 | 0.39 (0.19–0.80) | 0.38 (0.18–0.79) | 0.006 |
| Biliary colic | Dulaglutide | 0.46 (0.29–0.75) | 0.43 (0.26–0.72) | <0.001 | 0.50 (0.26–0.94) | 0.47 (0.24–0.92) | 0.026 | 0.76 (0.39–1.48) | 0.74 (0.37–1.51) | 0.503 |
| **Cholangitis** | Tirzepatide | 1.28 (0.90–1.81) | 1.29 (0.89–1.88) | 0.179 | 1.37 (0.87–2.16) | 1.40 (0.87–2.27) | 0.170 | 0.89 (0.27–2.94) | 0.89 (0.27–2.98) | 1.000 |
| Cholangitis | Liraglutide | 0.92 (0.60–1.41) | 0.92 (0.59–1.44) | 0.737 | 1.14 (0.70–1.88) | 1.15 (0.68–1.95) | 0.589 | 2.30 (0.90–5.90) | 2.34 (0.89–6.11) | 0.114 |
| Cholangitis | Exenatide | 1.11 (0.74–1.68) | 1.12 (0.73–1.73) | 0.652 | 1.24 (0.77–2.01) | 1.26 (0.76–2.09) | 0.426 | 5.61 (2.56–12.32) | 5.96 (2.66–13.35) | <0.001 |
| Cholangitis | Dulaglutide | 1.55 (1.01–2.38) | 1.59 (1.00–2.53) | 0.052 | 1.73 (1.00–3.00) | 1.80 (0.99–3.26) | 0.058 | 0.77 (0.17–3.62) | 0.77 (0.16–3.67) | 1.000 |
| **Cholecystitis** | Tirzepatide | 1.04 (1.00–1.08) | 1.28 (1.00–1.64) | 0.055 | 1.04 (0.99–1.09) | 1.27 (0.92–1.76) | 0.170 | 1.02 (0.98–1.06) | 1.22 (0.77–1.95) | 0.419 |
| Cholecystitis | Liraglutide | 1.06 (1.02–1.10) | 1.47 (1.11–1.96) | 0.007 | 1.04 (0.99–1.09) | 1.27 (0.90–1.78) | 0.180 | 1.02 (0.98–1.06) | 1.30 (0.79–2.15) | 0.330 |
| Cholecystitis | Exenatide | 1.09 (1.06–1.13) | 2.07 (1.50–2.87) | <0.001 | 1.09 (1.04–1.13) | 1.91 (1.31–2.77) | <0.001 | 1.02 (0.98–1.06) | 1.21 (0.76–1.94) | 0.485 |
| Cholecystitis | Dulaglutide | 1.03 (0.98–1.08) | 1.22 (0.87–1.70) | 0.285 | 1.03 (0.96–1.10) | 1.20 (0.77–1.86) | 0.513 | 1.04 (1.00–1.09) | 1.84 (0.95–3.56) | 0.083 |
| **Cholelithiasis** | Tirzepatide | 1.11 (1.03–1.19) | 1.27 (1.06–1.52) | 0.009 | 1.18 (1.07–1.30) | 1.47 (1.16–1.85) | 0.001 | 1.08 (0.99–1.18) | 1.27 (0.97–1.67) | 0.099 |
| Cholelithiasis | Liraglutide | 1.17 (1.09–1.27) | 1.49 (1.22–1.81) | <0.001 | 1.20 (1.08–1.32) | 1.53 (1.20–1.96) | <0.001 | 1.10 (1.00–1.21) | 1.34 (1.00–1.78) | 0.052 |
| Cholelithiasis | Exenatide | 1.27 (1.18–1.36) | 1.88 (1.52–2.32) | <0.001 | 1.36 (1.24–1.49) | 2.27 (1.76–2.92) | <0.001 | 1.11 (1.02–1.21) | 1.37 (1.04–1.81) | 0.027 |
| Cholelithiasis | Dulaglutide | 1.07 (0.97–1.19) | 1.18 (0.92–1.50) | 0.200 | 1.10 (0.96–1.27) | 1.25 (0.91–1.72) | 0.173 | 1.11 (1.00–1.23) | 1.39 (0.99–1.95) | 0.066 |
