# Supplementary material
Source: Research Square preprint supplement (doi:10.21203/rs.3.rs-9192889/v1)
Supplement: Supplementary file 2 [file c59842b7b0bcda395af1adbd.docx]

| **ADR** | **Semaglutide** | **Liraglutide** | **Exenatide** | **Dulaglutide** | **Tirzepatide** |
| --- | --- | --- | --- | --- | --- |
| Bile Duct Stone | 85 | 34 | 19 | 18 | 36 |
| Biliary Colic | 131 | 61 | 20 | 18 | 86 |
| Cholangitis | 59 | 27 | 33 | 28 | 54 |
| Cholecystitis | 923 | 527 | 525 | 302 | 695 |
| Cholelithiasis | 599 | 384 | 402 | 208 | 492 |

**Table 1.** ADR reports by GLP1-RA drug

| **ADR** | **Semaglutide** | **Liraglutide** | **Exenatide** | **Dulaglutide** | **Tirzepatide** | **% excluded** |
| --- | --- | --- | --- | --- | --- | --- |
| Bile Duct Stone | 0 | 0 | 0 | 1 | 0 | 0.52 |
| Biliary Colic | 0 | 1 | 0 | 0 | 0 | 0.32 |
| Cholangitis | 0 | 0 | 0 | 0 | 0 | 0 |
| Cholecystitis | 4 | 4 | 8 | 9 | 2 | 0.9 |
| Cholelithiasis | 0 | 2 | 6 | 5 | 1 | 0.67 |

**Table 2.** Deduplicated and excludedADR reports by GLP1-RA drug

| **ADR** | **Comparator (vs semaglutide)** | **PRR (95% CI)** | **ROR (95% CI)** | **Fisher p-value** |
| --- | --- | --- | --- | --- |
| Bile duct stone | Exenatide | 0.39 (0.23–0.65) | 0.37 (0.22–0.63) | <0.001 |
| Bile duct stone | Tirzepatide | 0.58 (0.39–0.84) | 0.56 (0.37–0.83) | 0.004 |
| Biliary colic | Exenatide | 0.30 (0.19–0.47) | 0.27 (0.17–0.44) | <0.001 |
| Biliary colic | Dulaglutide | 0.50 (0.30–0.82) | 0.46 (0.27–0.79) | 0.003 |
| Cholecystitis | Exenatide | 1.12 (1.08–1.16) | 2.39 (1.71–3.33) | <0.001 |
| Cholecystitis | Liraglutide | 1.07 (1.03–1.12) | 1.60 (1.20–2.14) | 0.001 |
| Cholecystitis | Tirzepatide | 1.05 (1.01–1.09) | 1.36 (1.06–1.74) | 0.018 |
| Cholelithiasis | Exenatide | 1.33 (1.23–1.44) | 2.12 (1.71–2.63) | <0.001 |
| Cholelithiasis | Liraglutide | 1.21 (1.11–1.31) | 1.58 (1.28–1.94) | <0.001 |
| Cholelithiasis | Tirzepatide | 1.15 (1.06–1.25) | 1.39 (1.15–1.67) | <0.001 |
| Cholangitis | Dulaglutide | 1.65 (1.05–2.60) | 1.71 (1.04–2.81) | 0.045 |

**Table 3-** PRR and ROR of ADR reports by GLP1 RA class drug

| **Drug** | **Total** | **Female n (%)** | **Male n (%)** | **Other/Unknown n (%)** |
| --- | --- | --- | --- | --- |
| Semaglutide | 1,156 | 714 (61.8) | 373 (32.3) | 69 (6.0) |
| Tirzepatide | 831 | 522 (62.8) | 197 (23.7) | 112 (13.5) |
| Liraglutide | 604 | 406 (67.2) | 174 (28.8) | 24 (4.0) |
| Exenatide | 571 | 317 (55.5) | 247 (43.3) | 7 (1.2) |
| Dulaglutide | 298 | 135 (45.3) | 138 (46.3) | 25 (8.4) |

**Table 4**-Sex distribution by GLP-1RA drug

| **Drug** | **Total with age** | **<18yr n (%)** | **18–44yr n (%)** | **45–64yr n (%)** | **65–74yr n (%)** | **75+ yr n (%)** | **Unknown age n (%)** |
| --- | --- | --- | --- | --- | --- | --- | --- |
| Semaglutide | 885 | 15 (1.7) | 230 (26.0) | 387 (43.7) | 176 (19.9) | 77 (8.7) | 271 (23.4%) |
| Tirzepatide | 564 | 0 (0.0) | 222 (39.4) | 253 (44.9) | 59 (10.5) | 30 (5.3) | 267 (32.1%) |
| Liraglutide | 468 | 8 (1.7) | 139 (29.7) | 200 (42.7) | 98 (20.9) | 23 (4.9) | 136 (22.5%) |
| Exenatide | 394 | 2 (0.5) | 39 (9.9) | 236 (59.9) | 95 (24.1) | 22 (5.6) | 177 (31.0%) |
| Dulaglutide | 202 | 1 (0.5) | 23 (11.4) | 77 (38.1) | 50 (24.8) | 51 (25.2) | 96 (32.2%) |

**Table 5-**Age distribution by GLP-1RA drug
